# Supplementary material for: Elevated ENSO extremes are reducing tropical forest invertebrate diversity and function
Source: Research Square preprint supplement (doi:10.21203/rs.3.rs-5081932/v1), 2024-10-30
Supplement: Supplementary file 1 [file 9a2f26883bb2c773779efee3.docx]

**METHODS**

**Invertebrate Diversity Datasets**

We utilized all of the available terrestrial tropical primary forest datasets that were referenced by van Klink et al. in 20201 and performed an extensive search of the literature published between 2020 and June 2024 to add further datasets. The only criteria that we applied to our search were: 1 – Invertebrate sampling should be standardized in search effort; 2 – Data collection should span a minimum of five years, although there was no limit on the minimum number of years surveyed within that span; 3 – Invertebrates should be identified to at least order-level; and 4 – Each study should have sampled at least one site in primary forest (any other sites not in primary forest were excluded from our analysis).

Despite these relatively open criteria, we found only six studies (21 order-level time series)2–9 with accessible data from the van Klink et al. list1 and only three additional studies with accessible data published since (12 order-level time series, S1a; S2)10–12. One of the added datasets was the only study published from Africa10. However, invertebrates in that dataset were identified only to order-level, and so instead of an approximation of order-level diversity we only had presence/absence for orders at site-scale. We accounted for this as far as possible in our statistical analysis (details below). Invertebrate orders were included in analysis only if they were clearly represented in at least two time series datasets.

We collated the following information: invertebrate order (Araneae, Blattodea, Coleoptera, Diptera, Hemiptera, Hymenoptera, Lepidoptera, Orthoptera or Stylommatophora), invertebrate taxon (species name or morphospecies code), taxonomic resolution (species/morphospecies-level or order-level identification), site nested within study, year and month of sampling, invertebrate abundance (not used), study latitude and longitude (not used), and day of sampling (where available, not used). The earliest recorded data was from 1965, although earliest data collection for most invertebrate orders was in the early 1980’s (S2).

The combined data comprised 406,476 individual observations from 202 sites of 8,910 distinct taxa, which were identified mostly to named species or morphospecies. In recognition of the coarse taxonomic resolution in some of our incorporated diversity times series, we expected that the number of true species present was higher than the number of reproducible taxonomic units we used. We removed as much of this confounding effect as possible by standardizing all taxa data before analysis (details below) but still we expect that the true signal in species diversity was dampened in our analysis, especially in hyper-diverse and cryptic taxa. Nonetheless, we expect that any statistically significant trends would only be amplified by use of an unrealistic dataset of complete taxonomic identifications. Our conclusions could therefore be under-estimates of the true scale of change occurring in primary tropical forests.

**ENSO Dataset**

ENSO data was in the form of the three-month rolling Oceanic Niño Index (ONI) compiled by the National Oceanic and Atmospheric Administration13. As a measure of the surface water temperature in the east-central Pacific Ocean that is representative of global ENSO state, the ONI varies temporally but not spatially. The timeseries in ONI values spans from the year 1950 to present. ONI data was linked to invertebrate diversity data at monthly scale where possible and at annual-mean scale where only sampling years were reported.

**Invertebrate Decomposition Rate Data**

Decomposition rate data were located by performing a rigorous literature search of Web of Science and ScienceDirect during late 2023 to early 2024. The search terms used were:

*(‘tropical forest’ OR ‘rainforest’) (‘decomposition’ OR ‘breakdown’ OR ‘decay’) AND (‘leaf’ OR ‘foliar’ OR ‘litter’) AND (‘litterbag’ OR ‘naphthalene’ OR ‘mesh size’) AND (‘soil animal’ OR ‘soil fauna’ OR ‘soil invertebrate’ OR ‘soil detritivore’)*

Studies were included when they met the following criteria: 1 – The author(s) conducted leaf litter decomposition experiments in the field; 2 – The author(s) used graded mesh sizes (fine mesh, size ≤ 1 mm, vs coarse, mesh size > 1 mm) or chemical agents (treatment vs control) to include or exclude invertebrates under equivalent abiotic and biotic conditions; 3 – The author(s) recorded litter decomposition as mass loss over a known time period; and 4 – At least some of the trials were conducted in primary forest (others were excluded from analysis). We collated the following information: study year, sample size (number of trials), treatment (invertebrates included or excluded), starting mass of leaf litter, ending mass of leaf litter, decomposition period, study latitude and longitude (not used), mean annual temperature (not used), mean annual precipitation (not used), soil pH (where available, not used) and leaf litter plant species (not used). We compiled decomposition rate data from a total of 36 studies, from which we found 2,156 individually measured trials (S1b). Earliest decomposition quantification was in 1983, although data was temporally sparse until the mid-1990’s (S5).

**Invertebrate Leaf Herbivory Data**

Herbivory rate data were located by performing a literature search analogous to that for decomposition data, of Web of Science and ScienceDirect, during July and August of 2024. The search terms used were:

*(‘tropical forest’ OR ‘rainforest’) AND (‘herbivory’ OR ‘damage’ OR ‘consumption’) AND (‘insect’ OR ‘invertebrate’ OR ‘arthropod’ OR ‘gastropod’) AND (‘leaf area consumed’ OR ‘leaf area loss’ OR ‘leaf damage’)*

Herbivory studies were included when they met the following criteria: 1 – The author(s) recorded leaf herbivory in the field; 2 – The author(s) quantified herbivory as leaf area lost from leaves; 3 – The author(s) reported either measuring leaf herbivory in a before and after format over a known time period, or opportunistically measured herbivory at a single time point; and 4 – At least some of the observations were from primary forest (others were excluded from analysis). We collated the following information: study year, number of plants species on which herbivory was quantified, leaf age (newly emerged or mature), proportion leaf area removed, duration of herbivory period (if applicable), study latitude and longitude (not used), study month (not used), number of individual plants sampled (where available, not used), number of leaves sampled per individual (where available, not used) and plant species identity (not used). We found herbivory measurements from a total of 40 studies, comprising 2,117 individually reported values. Since the majority of foliar herbivory occurs during leaf emergence14, we categorized herbivory observations into three categories to be considered during later analysis: 1 – Studies where the author(s) quantified herbivory of newly emerged leaves over a known period; 2 – Studies where the author(s) quantified herbivory of mature leaves over a known period; and 3 – Studies where the author(s) opportunistically quantified herbivory of mature leaves at a single time point (i.e. total herbivory over the leaf lifespan so far). From those three categories, we collated data from 8, 26 and 8 studies respectively. Those studies together reported 79, 711 and 1,327 herbivory values respectively.

**Modelling temporal change in invertebrate diversity**

For each of the nine invertebrate orders, and of course only those present in any one time series, we calculated taxonomic richness per site and per time point. For the one time series in which invertebrates were recorded only at order-level10, richness instead represented presence/absence only. To control for differences in richness between sites and between taxa, richness (or presence/absence) was standardized within sites and per order by dividing values by the standard deviation. The units of diversity analyzed where therefore standard deviations in per-site/taxon richness, Z.

We generalized shifts in invertebrate richness using *R version 4.3.1*15 and the *gamm* function from package *mgcv*16,17 to fit a generalized mixed model. We used a Tweedie family error distribution18,19 with variance exponent value of 2 (equivalent to the gamma distribution) to facilitate prediction of a skewed response variable including values of 0. A log link function was used. Fixed terms included were taxonomic order (in place of separate intercepts), ONI effect per order (the natural effect of ENSO), time effect per order (long-term diversity change), the interaction between ONI and time per order (changing effect of ENSO over time), and the interaction between, and the interaction between taxonomic resolution (species/morphospecies or order-level) and time (to control for the dampening effect of coarse taxonomic resolution on potential long-term diversity change). Time was centered on the year 2000 (therefore the intercept point) to computationally improve model fitting. As all terms were included in line with our biological hypothesis, and all terms were significant at the P < 0.05 level, we did not perform selection on the fixed parameters. Random terms were incorporated per site and were an intercept (to allow constant unexplained differences between study sites) and ONI effect (to allow varying ENSO impacts between sites). A continuous autocorrelation structure was incorporated into the model to control for potential temporal autocorrelation in the residuals resultant of timeseries analysis20,21. That structure was fitted to account for individual timeseries at the site- and taxon-scales (n = 392). Pearson’s autocorrelation in the normalized residuals within those site and taxon combinations was less than 0.03 in value (P > 0.05, calculated by randomization). Predictions were derived per taxon from the model only within the period for which data was available.

**Post-hoc analysis of model predictions**

We quantified the links between each of order-level long-term decline and global species richness, order-level long-term decline and ENSO sensitivity (naturally increasing under El Niño or La Niña), order-level shift in moderate El Niño (ONI = +1) response over time and ENSO sensitivity, and order-level shift in moderate La Niña (ONI = -1) response over time and ENSO sensitivity. For each comparison, we utilized the invertebrate diversity model parameter uncertainty to fit bootstrapped linear regressions. We sampled 10,000 sets of bootstrapped parameter values from a multivariate normal distribution defined by the means and variance-covariance matrix of model estimates. We then fitted 10,000 individual linear regression models to the bootstrapped values and took the quantiles in intercept and gradient estimates as confidence intervals. Predictions comparing time points 1980 and 2020 as well as ONI values of +1 and -1 were achieved by substituting those values into the model formula, and bootstrapping estimates via an equivalent procedure. We chose the years 1980 and 2020 for comparison as they represented points equidistant from the year 2000 intercept – this choice was taken relatively arbitrarily but reflects the linear change over the available timeseries data.

**Predicting temporal change in invertebrate-mediated decomposition and herbivory**

Both decomposition and herbivory data were converted into location-independent timeseries for temporal analysis. Decomposition rates were calculated according to Olson22. Specifically invertebrate decomposition was calculated as rate with invertebrates minus rate without invertebrates, all divided by rate with invertebrates. Relative weighting for each observation was calculated as the number of trials with invertebrates included multiplied by the number with invertebrates excluded, all divided by the sum of those same two values23. For every year where we had collated invertebrate decomposition rate data, we calculated the mean rate weighted by those calculated weights.

We conducted a similar rearrangement of the compiled herbivory rate data. For quantification of timed herbivory of newly emerged leaves (ranging in length from 2 to 5 weeks), we standardized measurements to proportion herbivory per month via a linear adjustment (assuming no change in herbivory rate within the first five weeks of leaf emergence). For quantification of timed herbivory of mature leaves (ranging in length from 2 weeks to 4.5 years), we standardized measurements to proportion herbivory per year via a similar linear adjustment. For each of those data types, plus opportunistic measurement of leaf herbivory at a single time point, we weighted observations according to the number of plant species for which each herbivory value represented. Per-year weighted mean values were then calculated as before.

Models were fitted predicting shift in each of decomposition and herbivory through time. As in our invertebrate diversity model, geographical location was omitted from our models such that they represented broad trends in tropical rate. We used a gaussian error family with no link function to predict invertebrate decomposition and a gamma error family with log link function to predict invertebrate herbivory. Both had continuous autocorrelation structures fitted to account for temporal autocorrelation in the respective residuals, and data points in both were weighted as per their previously described respective methods. The decomposition model contained only fixed parameters, whereas the herbivory model contained a single random intercept allowing for unexplained differences between the three categories of herbivory data. Fixed parameters were selected from the following combinations, each representing a biological hypothesis: time alone (long-term shift in rate but no fluctuation with ENSO), time and annual ONI maximum (long-term shift with El Niño-driven fluctuation), time interacting with annual ONI maximum (long-term shift in El Niño-driven fluctuation), time and annual ONI minimum (long-term shift with La Niña-driven fluctuation), time interacting with annual ONI minimum (long-term shift in La Niña-driven fluctuation), time after year 2000 (long-term shift but only starting from the turn of the millennium), time and annual ONI maximum (long-term shift since 2000 with El Niño-driven fluctuation), time after year 2000 interacting with annual ONI maximum (long-term shift in El Niño-driven fluctuation since 2000), time and annual ONI minimum (long-term shift since 2000 with La Niña-driven fluctuation), and time interacting with annual ONI minimum (long-term shift in La Niña-driven fluctuation since 2000). As before, time was centered on the year 2000. Weighted Spearman’s rank correlation between annual data points and the predicted generalized diversities of each of the nine studied invertebrate orders were calculated using the *wCorr* package24.

**REFERENCES**

1. van Klink, R. *et al.* Meta-analysis reveals declines in terrestrial but increases in freshwater insect abundances. *Science* **368**, 417–420 (2020).

2. Schowalter, T. D., Pandey, M., Presley, S. J., Willig, M. R. & Zimmerman, J. K. Arthropods are not declining but are responsive to disturbance in the Luquillo Experimental Forest, Puerto Rico. *Proc. Natl. Acad. Sci.* **118**, e2002556117 (2021).

3. Roubik, D. W. Ups and downs in pollinator populations: When is there a decline? *Conserv. Ecol.* **5**, (2001).

4. Richardson, B. A. The bromeliad microcosm and the assessment of faunal diversity in a neotropical forest. *Biotropica* **31**, 321–336 (1999).

5. Willig, M. R. & Bloch, C. P. El Verde Grid long-term invertebrate data: Luquillo Long Term Ecological Research Site Database: Data Set 107. (2016).

6. Schowalter, T. D. & Ganio, L. M. Invertebrate communities in a tropical rain forest canopy in Puerto Rico following Hurricane Hugo. *Ecol. Entomol.* **24**, 191–201 (2001).

7. Dornelas, M. *et al.* BioTIME: A database of biodiversity time series for the Anthropocene. *Glob. Ecol. Biogeogr.* **27**, 760–786 (2018).

8. Bonebrake, T. C. *et al.* Warming threat compounds habitat degradation impacts on a tropical butterfly community in Vietnam. *Glob. Ecol. Conserv.* **8**, 203–211 (2016).

9. Chen, I.-C. *et al.* Elevation increases in moth assemblages over 42 years on a tropical mountain. *Proc. Natl. Acad. Sci.* **106**, 1479–1483 (2009).

10. Opito, E. A. *et al.* 30 years brings changes to the arthropod community of Kibale National Park, Uganda. *Biotropica* **55**, 529–539 (2023).

11. Basset, Y. *et al.* Abundance, occurrence and time series: long-term monitoring of social insects in a tropical rainforest. *Ecol. Indic.* **150**, 110243 (2023).

12. Wagner, D. L., Fox, R., Salcido, D. M. & Dyer, L. A. A window to the world of global insect declines: Moth biodiversity trends are complex and heterogeneous. *Proc. Natl. Acad. Sci.* **118**, e2002549117 (2021).

13. Huang, B. *et al.* Extended Reconstructed Sea Surface Temperature, Version 5 (ERSSTv5): Upgrades, validations, and intercomparisons. *J. Clim.* **30**, 8179–8205 (2017).

14. Coley, P. D. & Barone, J. A. Herbivory and plant defenses in tropical forests. *Annu. Rev. Ecol. Syst.* **27**, 305–335 (1996).

15. R Core Team. R: A language and environment for statistical computing. (2023).

16. Wood, S. N. Fast stable restricted maximum likelihood and marginal likelihood estimation of semiparametric generalized linear models. *J. R. Stat. Soc. Ser. B Stat. Methodol.* **73**, 3–36 (2011).

17. Wood, S. N. Stable and efficient multiple smoothing parameter estimation for generalized additive models. *J. Am. Stat. Assoc.* **99**, 673–686 (2004).

18. Wood, S. N., Pya, N. & Säfken, B. Smoothing parameter and model selection for general smooth models. *J. Am. Stat. Assoc.* **111**, 1548–1563 (2016).

19. Dunn, P. K. & Smyth, G. K. Series evaluation of Tweedie exponential dispersion model densities. *Stat. Comput.* **15**, 267–280 (2005).

20. G. E. P. Box, Jenkins, G. M. & Reinsel, G. C. *Time series analysis: Forecasting and control*. (Holden-Day, 1994).

21. Jones, R. H. *Longitudinal data with serial correlation: A state-space approach*. (Chapman and Hall, 1993).

22. Olson, J. S. Energy storage and the balance of producers and decomposers in ecological systems. *Ecology* **44**, 322–331 (1963).

23. van Groenigen, K. J., Osenberg, C. W. & Hungate, B. A. Increased soil emissions of potent greenhouse gases under increased atmospheric CO2. *Nature* **475**, 214–216 (2011).

24. Bailey, P. & Emad, A. wCorr: Weighted correlations. (2023).
